# Supplementary material
Source: PubMed Central journal article supplement (PMC2688582)
Supplement: 2008.002691_1.pdf [file 2008.002691_1.pdf]

## CD4 counts and the risk of systemic non-Hodgkin's lymphoma in individuals with HIV in the UK

Mark Bower,<sup>1</sup> Martin Fisher,<sup>2</sup> Teresa Hill,<sup>3</sup> Iain Reeves,<sup>2</sup> John Walsh,<sup>4</sup> Chloe Orkin,<sup>2</sup> Andrew N. Phillips,<sup>3</sup> Loveleen Bansal,<sup>3</sup> Richard Gilson,<sup>3</sup> Philippa Easterbrook,<sup>6</sup> Margaret Johnson,<sup>7</sup> Brian Gazzard,<sup>1</sup> Clifford Leen,<sup>8</sup> Deenan Pillay,<sup>9</sup> Achim Schwenk,<sup>10</sup> Jane Anderson,<sup>11</sup> Kholoud Porter,<sup>12</sup> Mark Gompels,<sup>13</sup> and Caroline A. Sabin<sup>3</sup> for the UK CHIC Steering Committee

<sup>1</sup>Chelsea and Westminster Hospital, London; <sup>2</sup>Brighton and Sussex University Hospital NHS Trust; <sup>3</sup>UCL Medical School, London; <sup>4</sup>St. Mary's NHS Trust, London; <sup>5</sup>St. Bartholomews and the Royal London Hospitals; <sup>6</sup>Kings College London School of Medicine at Guy's, Kings College and St. Thomas' Hospitals, London; <sup>7</sup>Royal Free NHS Trust, London; <sup>8</sup>Western General Hospital, Edinburgh; <sup>9</sup>University College London; <sup>10</sup>North Middlesex University Hospital NHS Trust; <sup>11</sup>Homerton University Hospital NHS Foundation Trust, London; <sup>12</sup>Medical Research Council Clinical Trials Unit, London, and <sup>13</sup>North Bristol NHS Trust, Bristol, UK

*Citation:* Bower M, Fisher M, Hill T, Reeves I, Walsh J, Orkin C, Phillips AN, Bansal L, Gilson R, Easterbrook P, Johnson M, Gazzard B, Leen C, Pillay D, Schwenk A, Anderson J, Porter K, Gompels M, and Sabin CA for the UK CHIC Steering Committee. CD4 counts and the risk of systemic non-Hodgkin's lymphoma in individuals with HIV in the UK. *Haematologica* 2009. doi: 10.3324/haematol.2008.002691

### UK CHIC Steering Committee

Andrew N Phillips, Richard Gilson, Philippa Easterbrook, Martin Fisher, Brian Gazzard, Margaret Johnson, John Walsh, Clifford Leen, Chloe Orkin, Jane Anderson, Deenan Pillay, Valerie Delpech, Achim Schwenk, David Dunn, Mark Gompels, Teresa Hill, Kholoud Porter, Abdel Babiker, Caroline Sabin.

### Central Co-ordination

Royal Free and University College, London (Loveleen Bansal, Teresa Hill, Andrew Phillips, Caroline Sabin); Medical Research Council Clinical Trials Unit (MRC CTU), London (Abdel Babiker, David Dunn, Kholoud Porter, Stephen Sheehan)

### Participating Centers

King's College Hospital, London (Philippa Easterbrook, Anele Waters, Dorian Crates, Siti Mohamed-Saad); Brighton and Sussex University Hospitals NHS Trust (Martin Fisher, Nicky

Perry, Anthony Pullin, Duncan Churchill, Wendy Harris); Chelsea and Westminster NHS Trust, London (Brian Gazzard, Steve Bulbeck, Sundhiya Mandalia, Jemima Clarke); Mortimer Market Centre, Royal Free and University College Medical School (RFUCMS), London (Richard Gilson, Julie Dodds, Andy Rider, Ian Williams); Health Protection Agency–Centre for Infections, London (Valerie Delpech); Royal Free NHS Trust and RFUCMS, London (Margaret Johnson, Mike Youle, Fiona Lampe, Colette Smith, Helen Gumley, Clinton Chaloner, Dewi Ismajani Puradiredja); St. Mary's Hospital, London (John Walsh, Jonathan Weber, Shane Cashin, Christian Kemble, Nicola Mackie, Alan Winston); Barts and The London NHS Trust, London (Chloe Orkin, Rachel Thomas, Kevin Jones); Homerton Hospital, London (Jane Anderson, Selina Gann, Kevin Jones); Edinburgh (Clifford Leen, Alan Wilson); North Middlesex (Achim Schwenk, Jonathan Ainsworth); North Bristol NHS Trust (Mark Gompels).
